# Supplementary material for: UTRme: A Scoring-Based Tool to Annotate Untranslated Regions in Trypanosomatid Genomes
Source: Front Genet. 2018 Dec 18;9:671. doi: 10.3389/fgene.2018.00671 (PMC6305552; doi:10.3389/fgene.2018.00671)
Supplement: Supplementary file 3 [file Table_1.xlsx]

## Sheet: ST1
chr	start	end	strand	gene	utr_len	acceptor	ppt	ppt_distance	ppt_len	sprimary	ssecondary	saccesory	individual_score	global_score	score	occurrence	sites	n	orf	max_occurrence	max_score
TcChr10-S	53244	53579	-	TcCLB.511911.98	27	AG	CTTTTTTTTTTTTTTTTTTTATCCT	5	25	27	31	12	70	25	95	65	1	0	-	Yes	Yes
TcChr10-S	51716	52053	-	TcCLB.511911.94	16	AG	TTTTTTTTTTTTTCCTTTTTTTTGTTTTTTTTTTCTCTCTTT	15	42	26	29	16	71	25	96	140	4	0	-	-	Yes
TcChr10-S	51716	52053	-	TcCLB.511911.94	24	AG	TTTTTTTTTTTTTCCTTTTTTTTGTTTTTTTTTTCTCTCTTT	7	42	25	30	15	70	25	95	244	4	0	-	Yes	-
TcChr10-S	51716	52053	-	TcCLB.511911.94	20	GG	TTTTTTTTTTTTTCCTTTTTTTTGTTTTTTTTTTCTCTCTTT	11	42	30	28	10	69	5	74	5	4	0	-	-	-
TcChr10-S	51716	52053	-	TcCLB.511911.94	334	TG	-1	-1	-1	30	18	-13	35	0	35	1	4	0	VHYSLLDHDACFFVSVFFFFLFFVFFFSLYMSRKGFVNP	-	-
TcChr10-S	44760	51017	-	TcCLB.511911.90	36	AG	TCCCCTTTCCCTCTGCCCTCCTCC	3346	24	26	28	0	54	25	79	337	7	0	-	Yes	Yes
TcChr10-S	44760	51017	-	TcCLB.511911.90	7	AG	TCCCCTTTCCCTCTGCCCTCCTCC	3375	24	30	31	11	72	0	72	1	7	0	-	-	-
TcChr10-S	44760	51017	-	TcCLB.511911.90	34	AG	TCCCCTTTCCCTCTGCCCTCCTCC	3348	24	23	28	8	60	5	65	9	7	0	-	-	-
TcChr10-S	44760	51017	-	TcCLB.511911.90	12	CG	TCCCCTTTCCCTCTGCCCTCCTCC	3370	24	30	26	5	61	0	61	1	7	0	-	-	-
TcChr10-S	44760	51017	-	TcCLB.511911.90	97	AG	TCCCCTTTCCCTCTGCCCTCCTCC	3285	24	25	29	6	60	0	60	1	7	0	LFLHRCGLSPFILSLPRENRGLTRSPTRRVI	-	-
Supplementary table 1. Example of UTRme full report of epimastigote's SL sites using epimastigote RNA-seq data from Li, Y., et al. [30]. The first 10 lines are shown
